# Supplementary material
Source: MDPI journal article supplement (https://www.mdpi.com/2073-4395/12/12/3001)
Supplement: s1 [file s1]

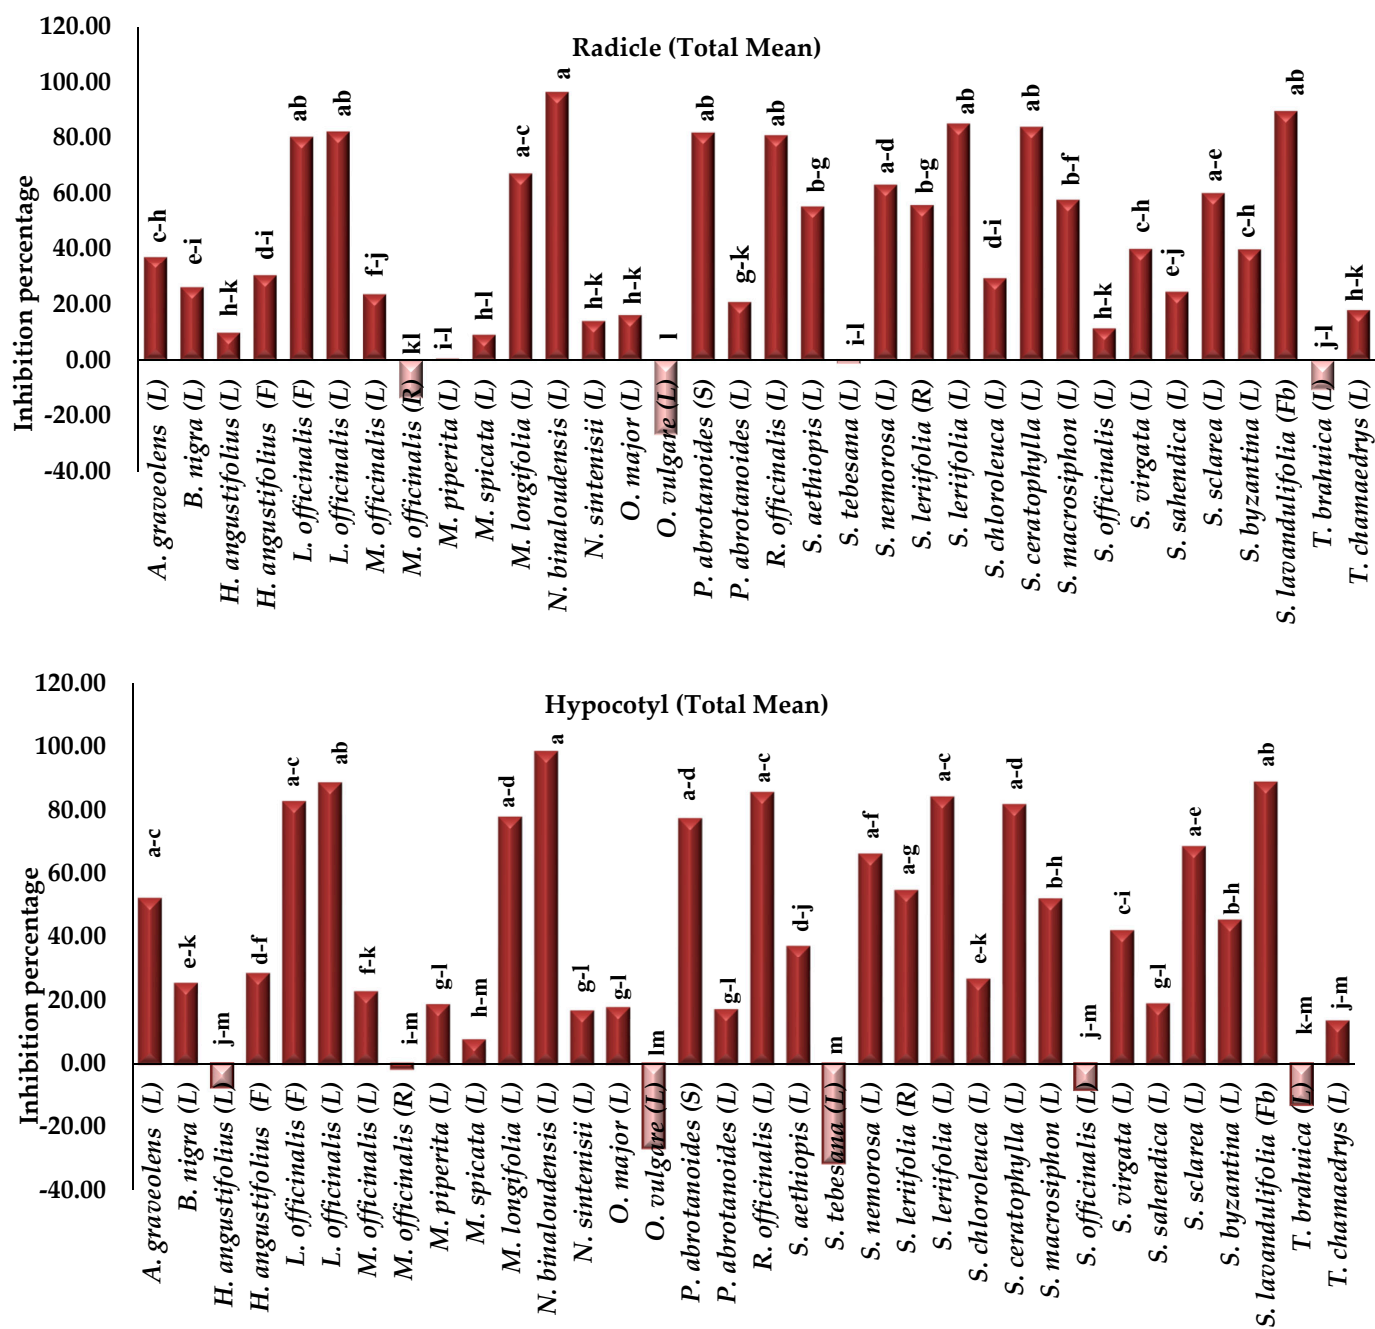

Figure S1. Allelopathic effects of plant species of Lamiaceae on radicle and hypocotyl of lettuce

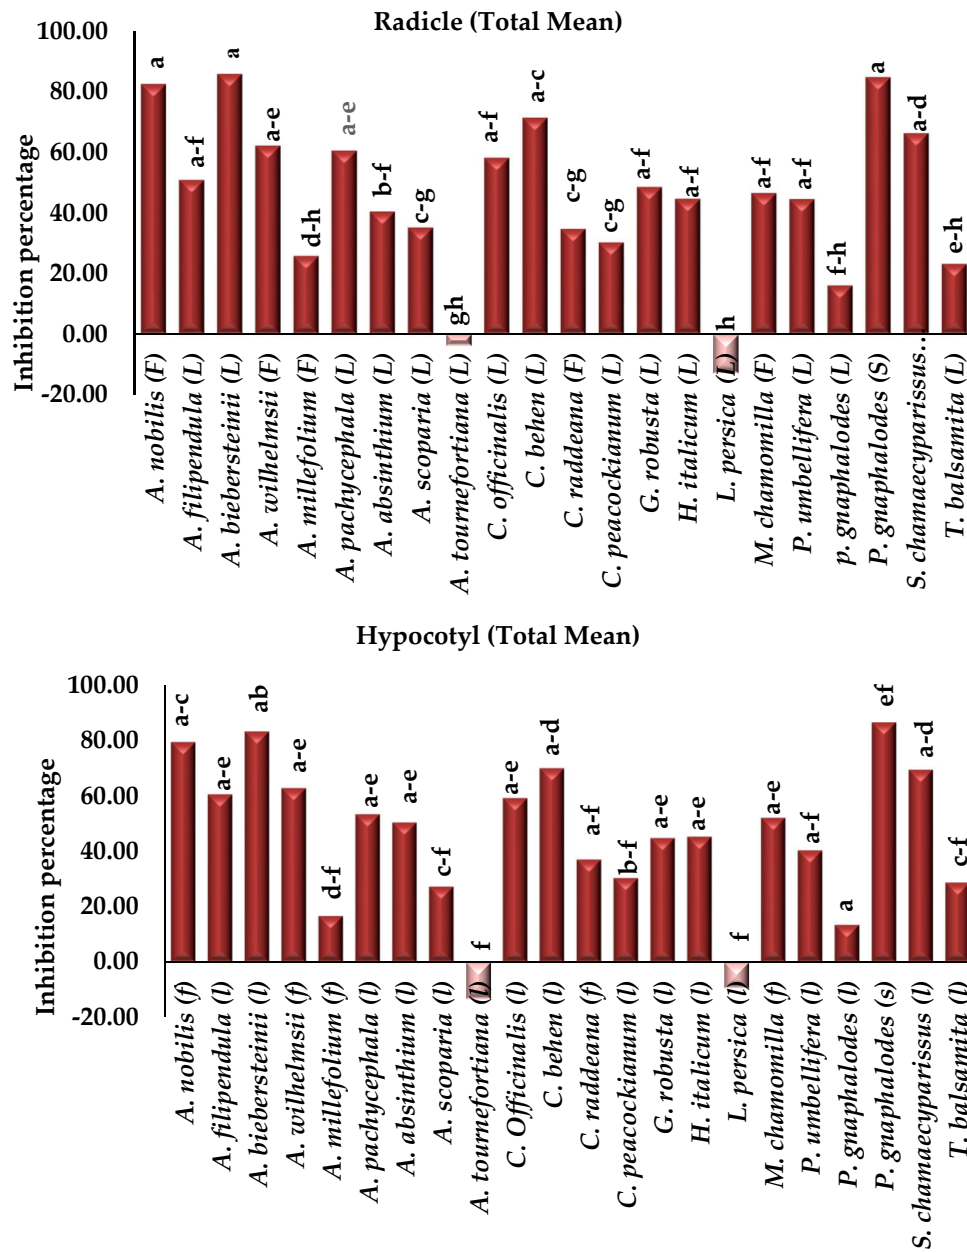

Figure S2. Allelopathic effects of plant species of Asteraceae on radicle and hypocotyl of lettuce

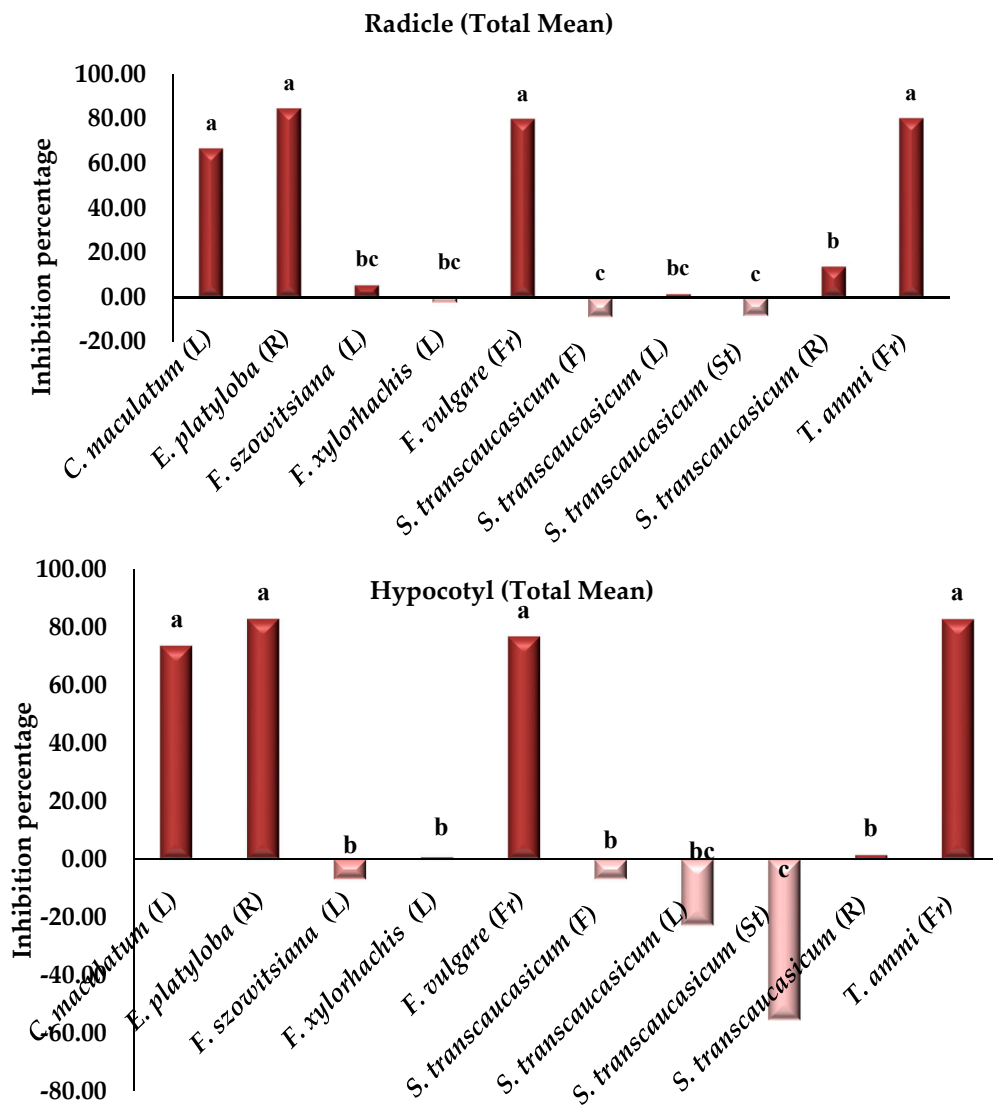

Figure S3. Allelopathic effects of plant species of Apiaceae on radicle and hypocotyl of lettuce

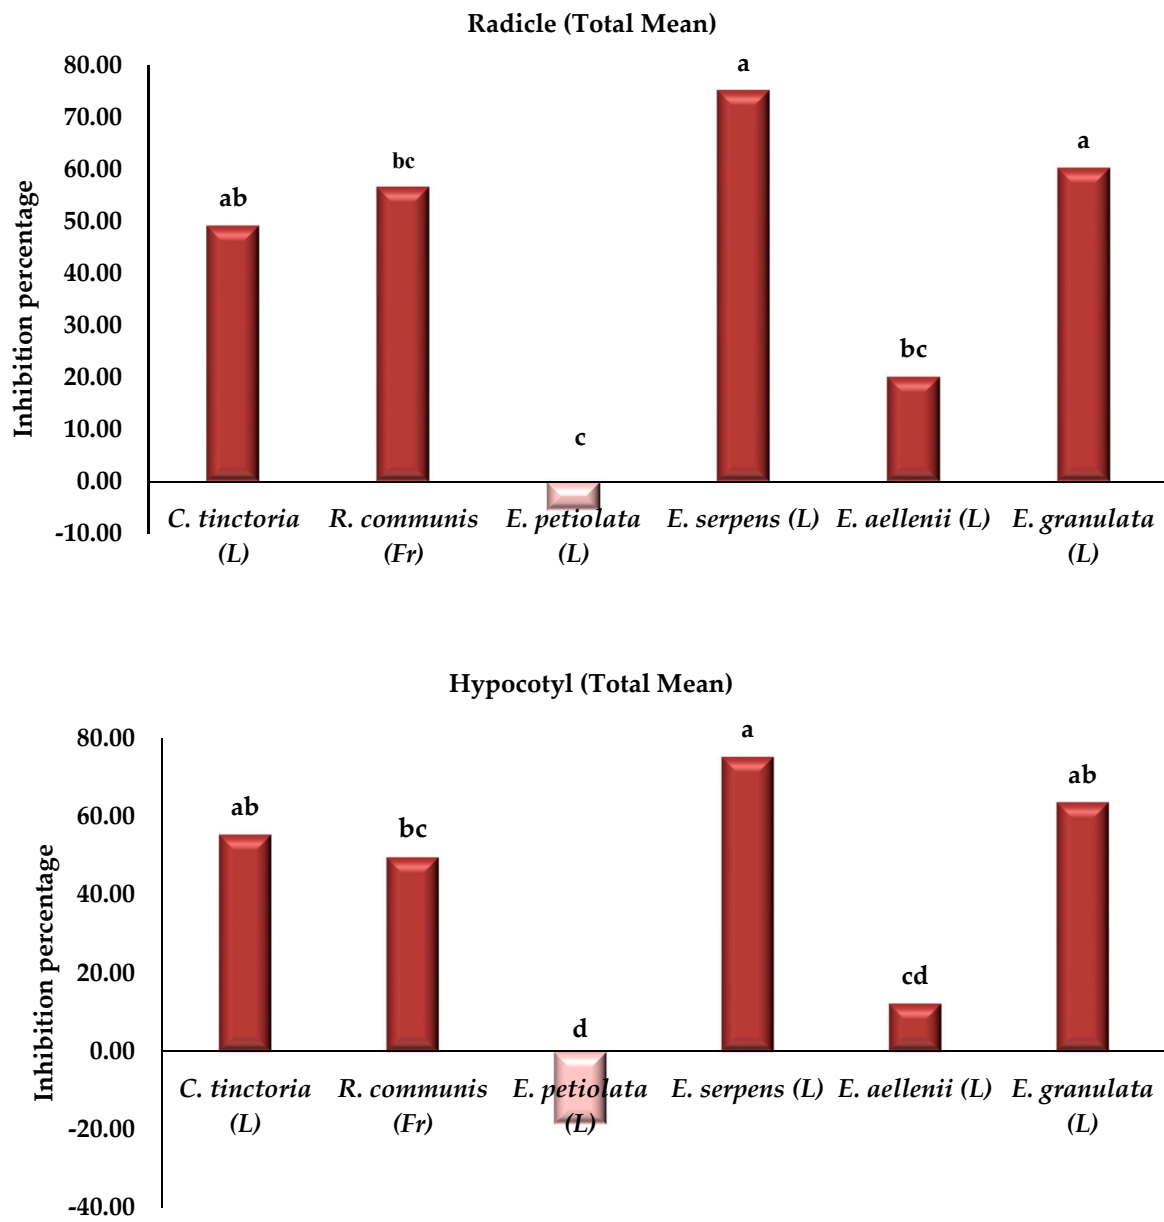

**Figure S4.** Allelopathic effects of plant species of Euphorbiaceae on radicle and hypocotyl of lettuce

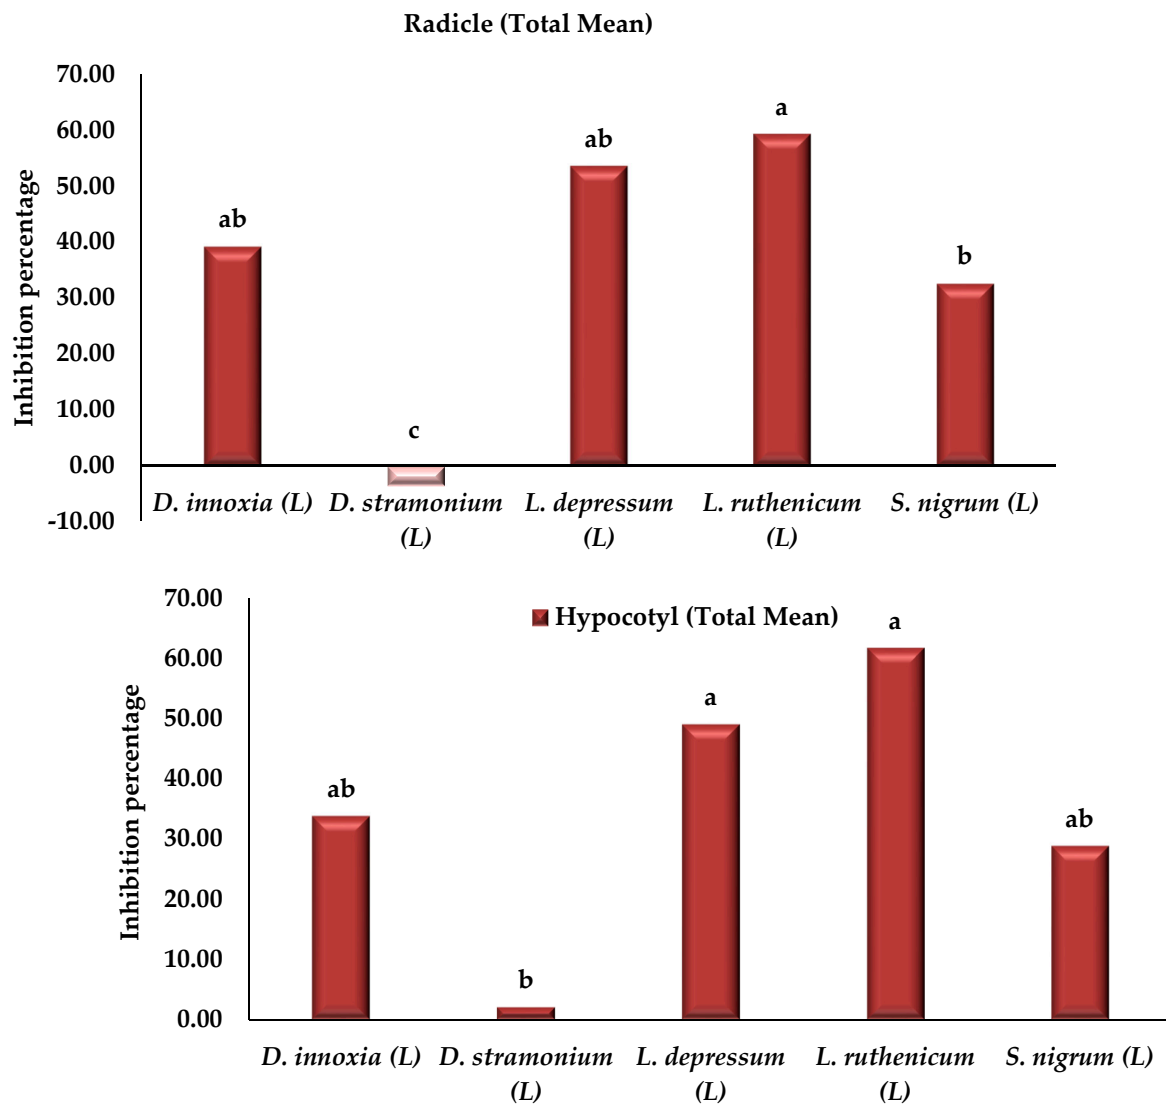

**Figure S5.** Allelopathic effects of plant species of Solanaceae on radicle and hypocotyl of lettuce

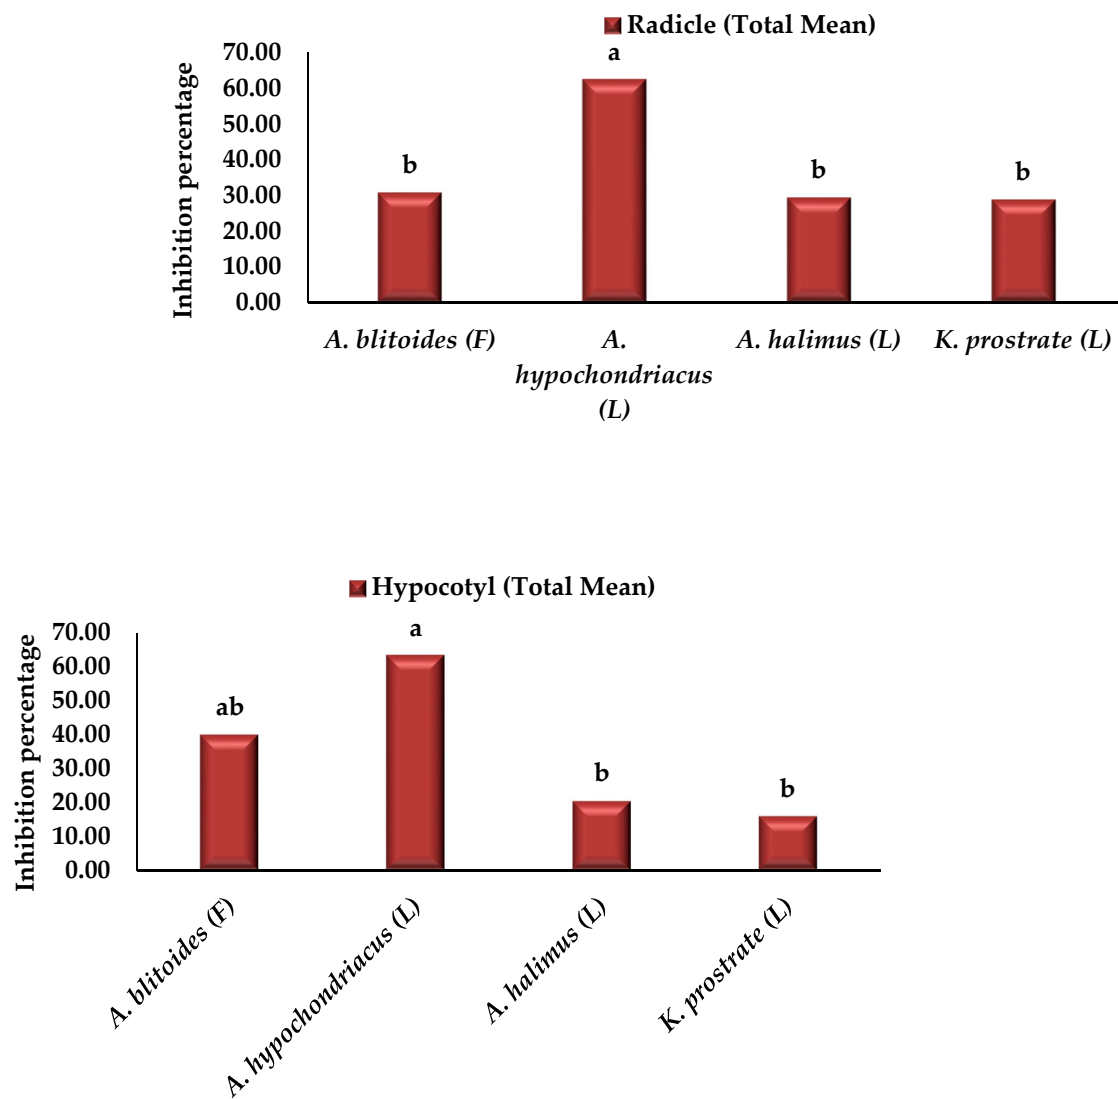

Figure S6. Allelopathic effects of plant species of Amaranthaceae on radicle and hypocotyl of lettuce

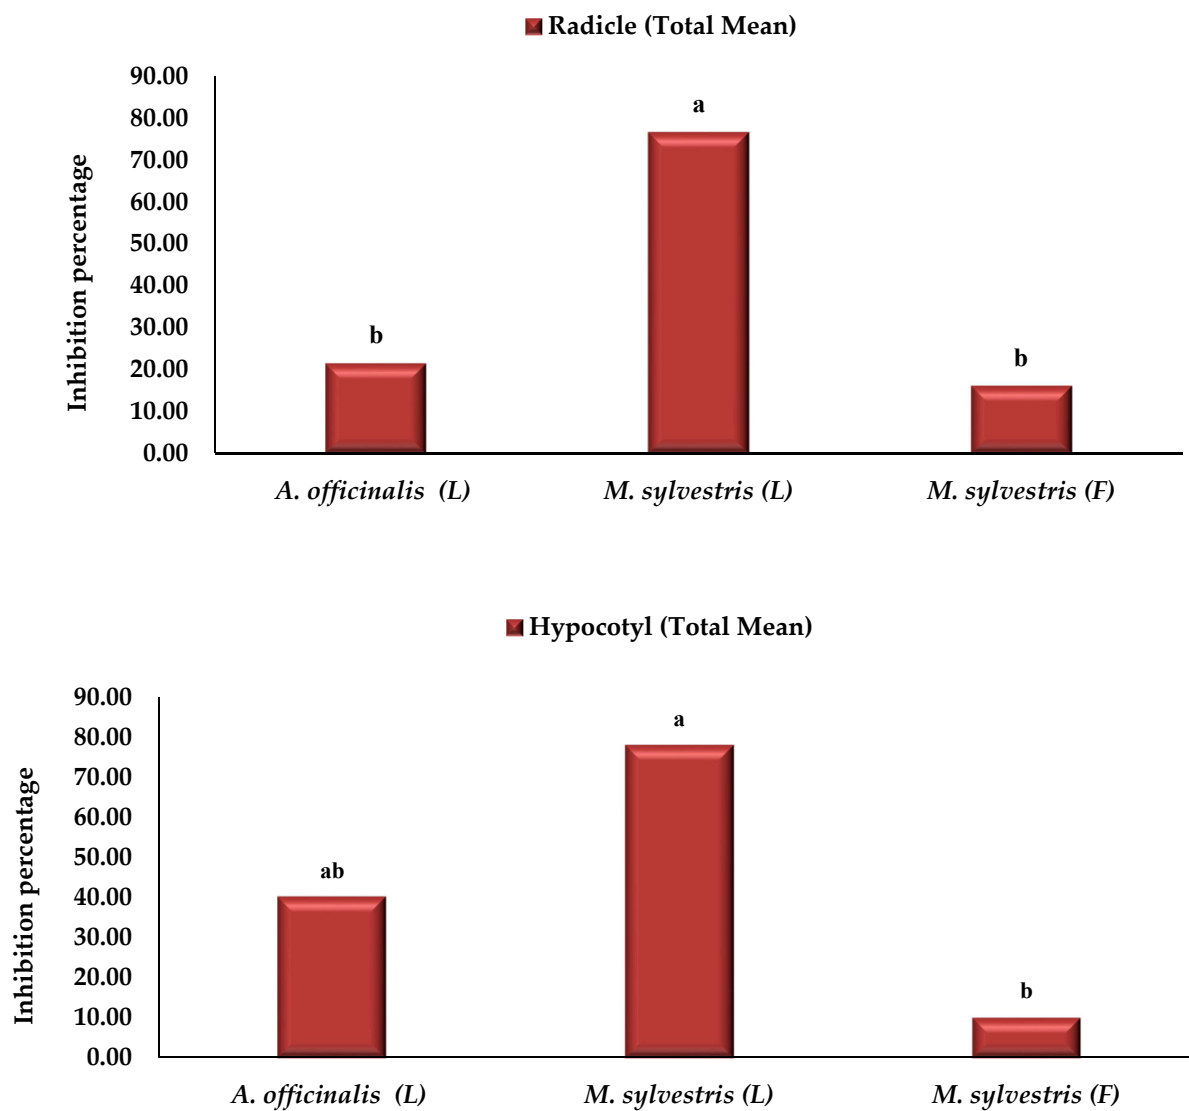

Figure S7. Allelopathic effects of plant species of Malvaceae on radicle and hypocotyl of lettuce

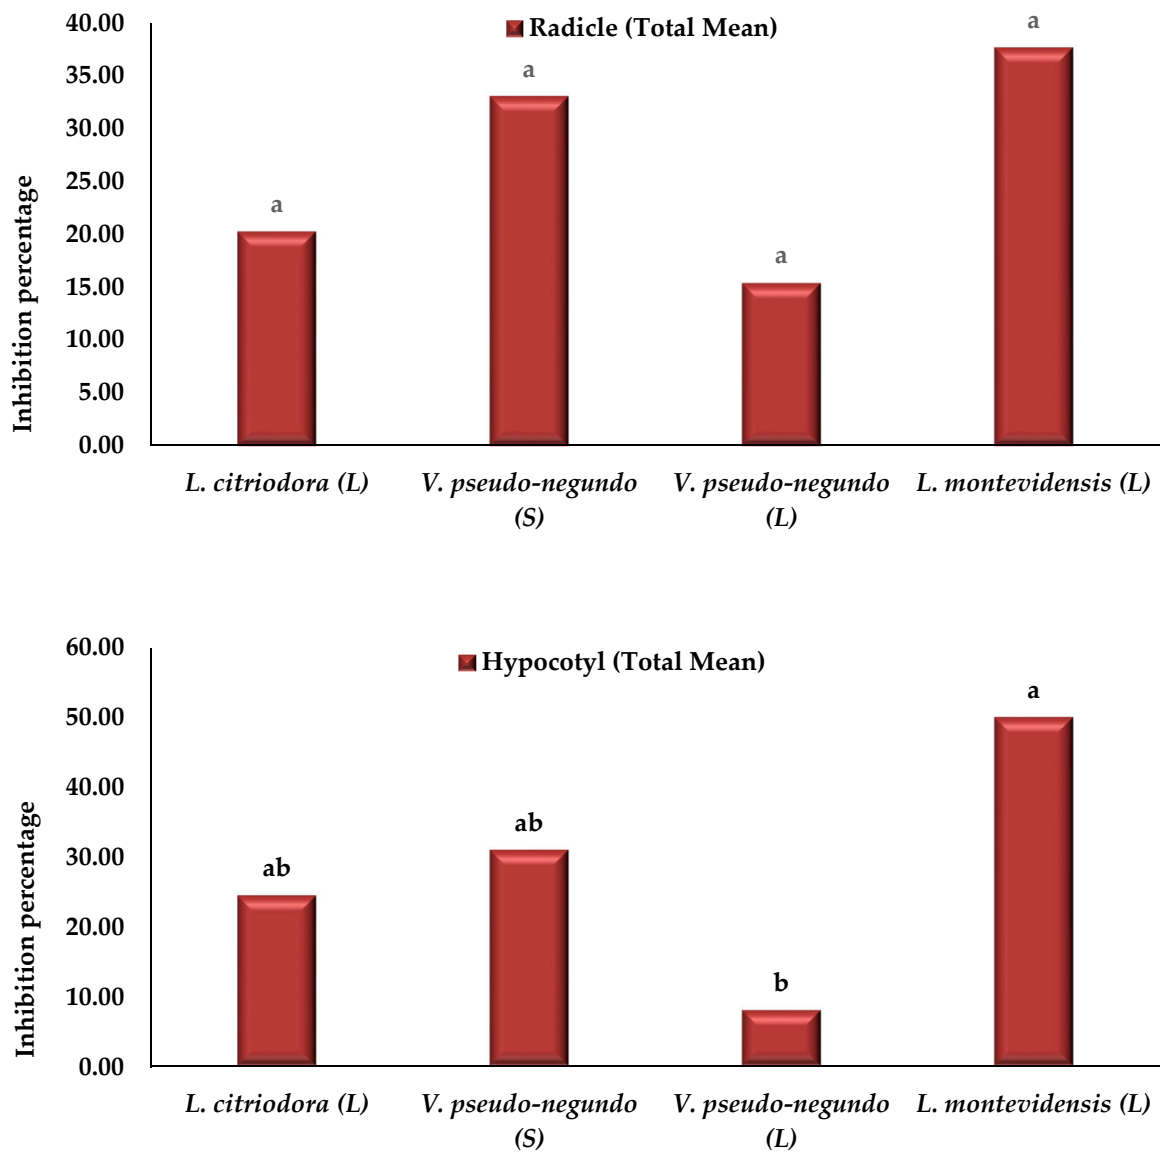

Figure S8. Allelopathic effects of plant species of Verbenaceae on radicle and hypocotyl of lettuce



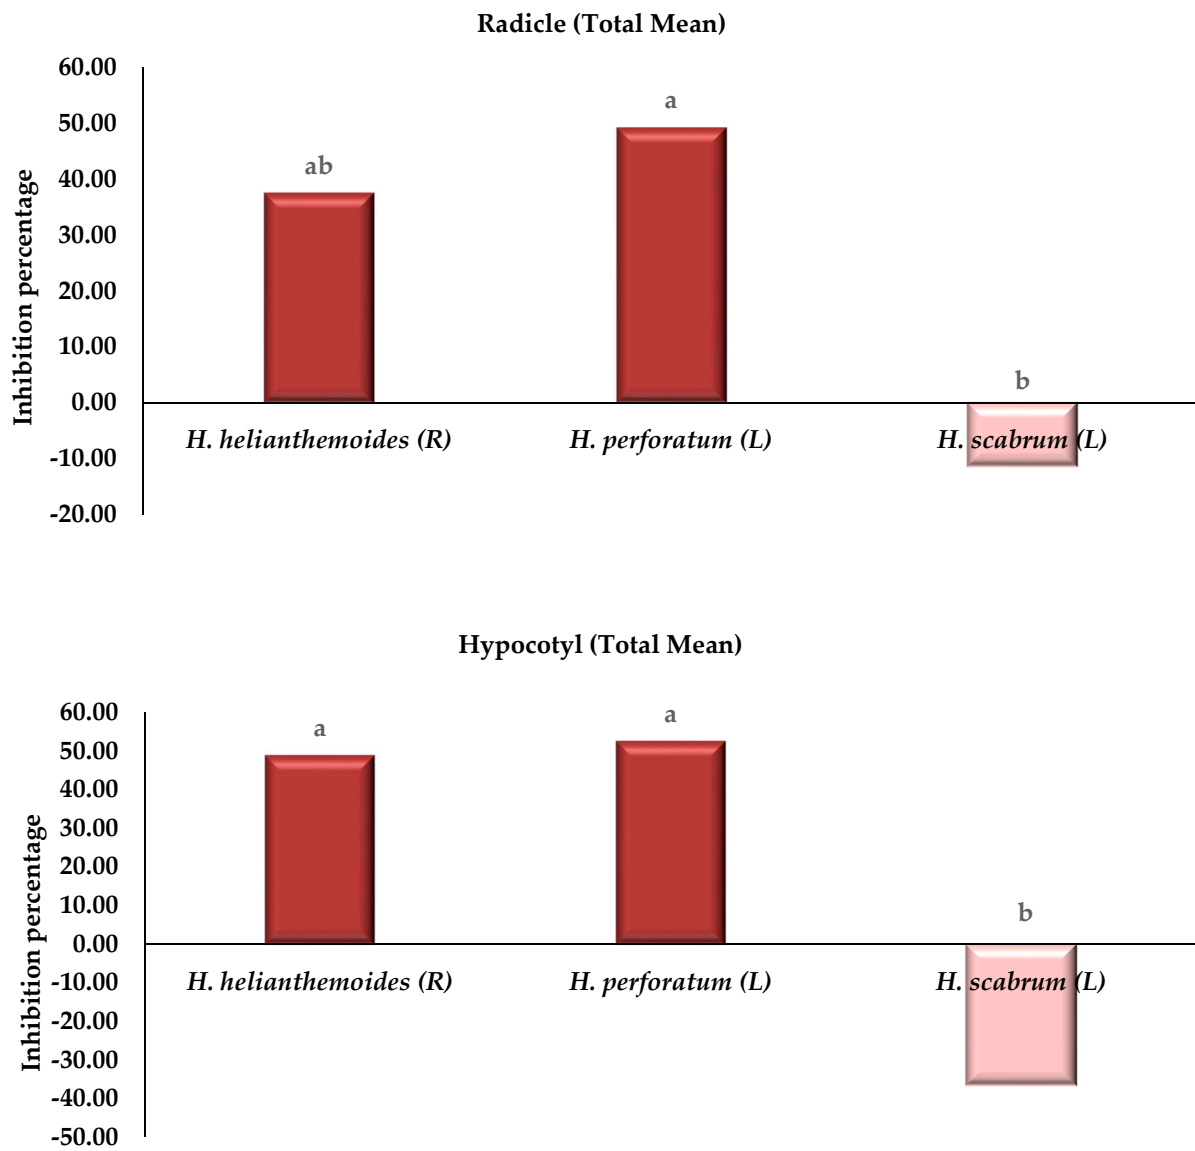

**Figure S9.** Allelopathic effects of plant species of Hypericaceae on radicle and hypocotyl of lettuce
